# Supplementary material for: Hybridization induced fluorescence turn-on of AIEgen–oligonucleotide conjugates for specific DNA detection
Source: Royal Society of Chemistry journal article supplement (doi:10.1039/c5ra00322a), 2015-01-01
Supplement: c5ra00322a1.pdf [file c5ra00322a1.pdf]

## Electronic Supplementary Information

### Hybridization induced fluorescence turn-on of AIEgen-oligonucleotide conjugates for specific DNA detection

Ruoyu Zhang,<sup>a</sup> Ryan T. K. Kwok,<sup>b</sup> Ben Zhong Tang,<sup>\*bc</sup> and Bin Liu<sup>\*ad</sup>,

<sup>a</sup> Department of Chemical and Biomolecular Engineering, National University of Singapore, 4 Engineering Drive 4, Singapore 117585.

<sup>b</sup> Department of Chemistry, Division of Biomedical Engineering, The Hong Kong University of Science and Technology, Clear Water Bay, Kowloon, Hong Kong, China

<sup>c</sup> SCUT-HKUST Joint Research Laboratory, Guangdong Innovative Research Team, State Key Laboratory of Luminescent Materials & Devices, South China University of Technology, Guangzhou 510640, China

<sup>d</sup> Institute of Materials Research and Engineering (A\*STAR), 3 Research Link, Singapore 117602

\* Corresponding author. Tel: 65-6516-8409; fax: 65-6778-1936; E-mail: [cheliub@nus.edu.sg](mailto:cheliub@nus.edu.sg).

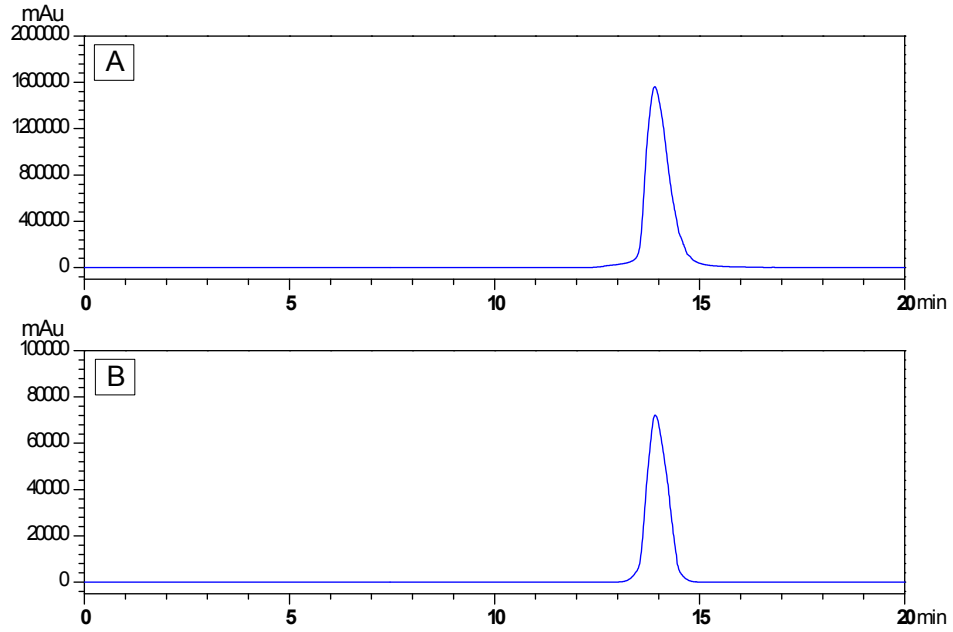

Figure S1 Reverse phase-HPLC spectra of TPE-2DNA<sub>1</sub> conjugate with absorbance at both (A) 260 nm and (B) 318 nm (retention time = 13.9 min).

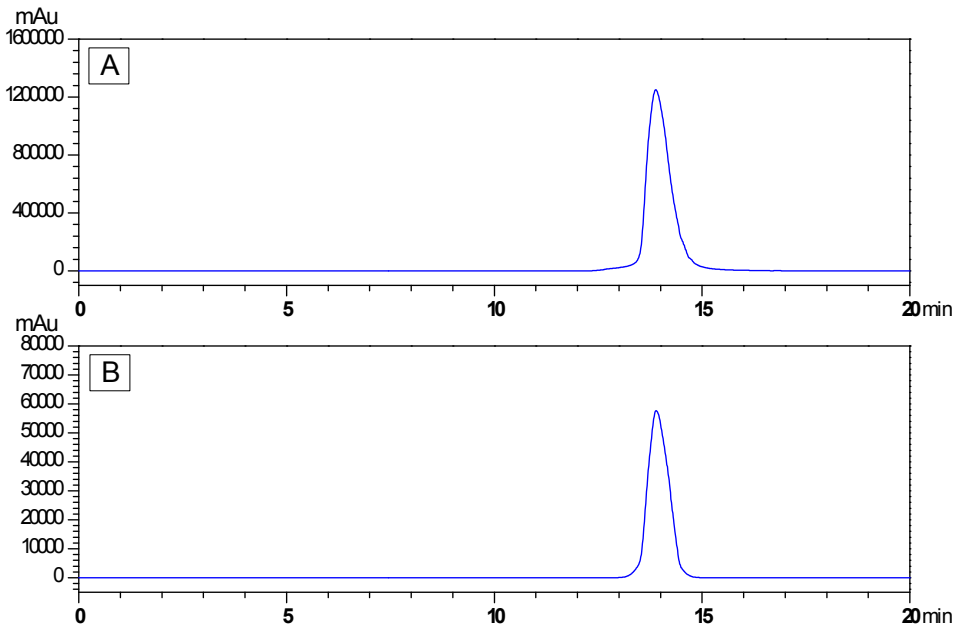

Figure S2 Reverse phase-HPLC spectra of TPE-2DNA<sub>2</sub> conjugate with absorbance at both (A) 260 nm and (B) 318 nm (retention time = 14.1 min).

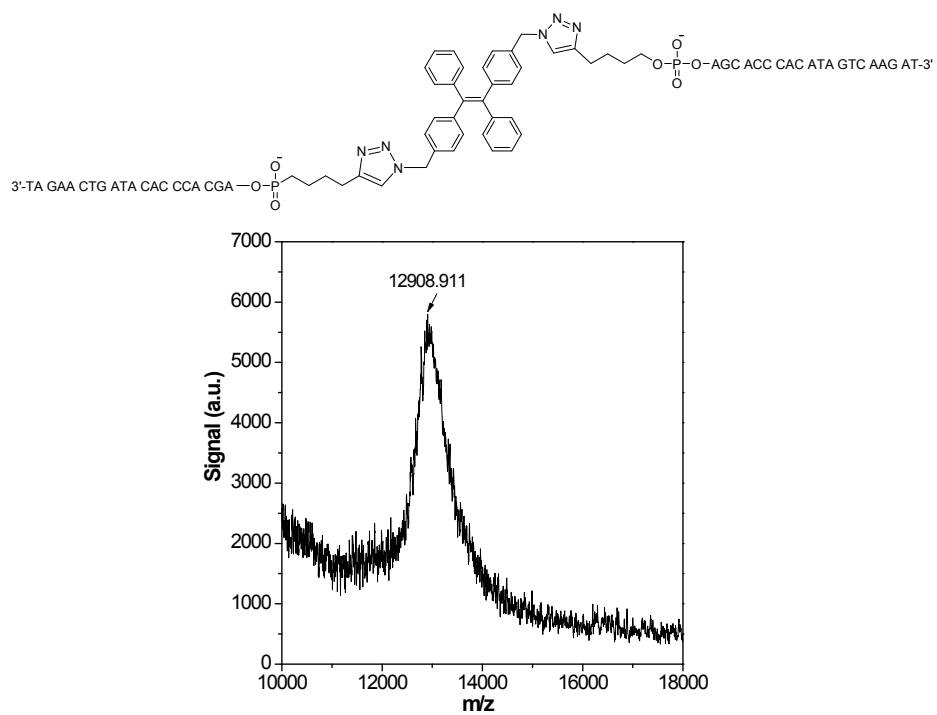

Figure S3 Chemical structure and MALDI-TOF spectrum of TPE-2DNA<sub>1</sub>: m/z = 12908.911 (12886.375 theoretical).

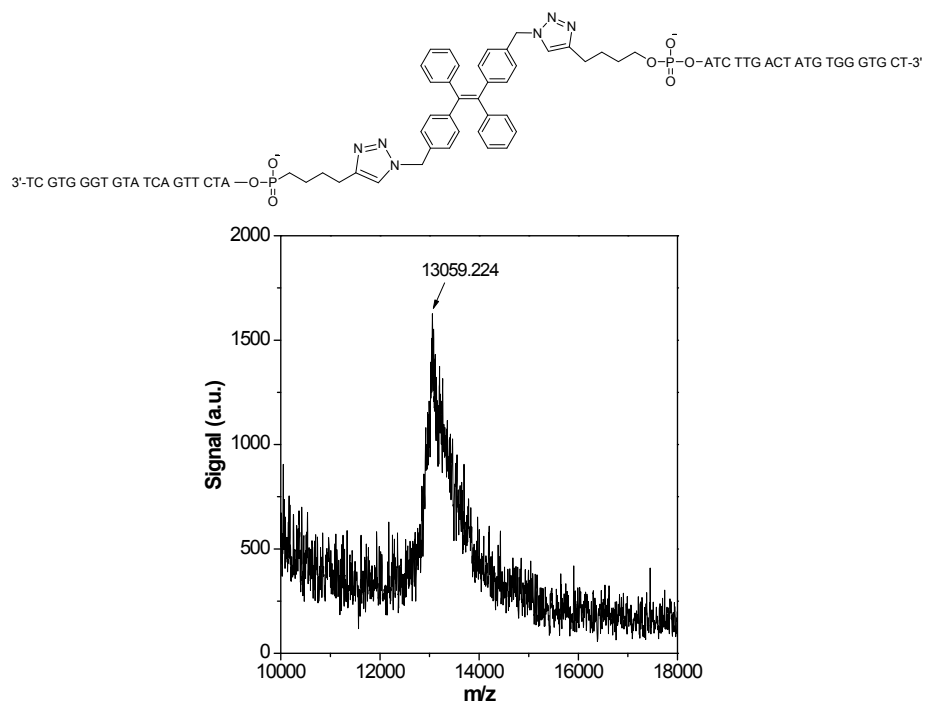

Figure S4 Chemical structure and MALDI-TOF spectrum of TPE-2DNA<sub>2</sub>: m/z = 13059.224 (13036.296, theoretical).
